# Supplementary material
Source: PubMed Central journal article supplement (PMC6990807)
Supplement: jama-323-35-s002.pdf [file jama-323-35-s002.pdf]

## Supplementary Online Content

Schisterman EF, Sjaarda LA, Clemons T, et al. Effect of folic acid and zinc supplementation in men on semen quality and live birth among couples undergoing infertility treatment: a randomized clinical trial. *JAMA*. doi:10.1001/jama.2019.18714

**eTable 1.** Semen quality after six months of trial intervention in the Folic Acid and Zinc Supplementation Trial by intervention group, using non-parametric testing

**eTable 2.** Semen quality after six months of trial intervention in the Folic Acid and Zinc Supplementation Trial by intervention group, treating samples with inadequate sperm concentration (no sperm in sample, rare/too few to calculate, retrograde) as missing

**eTable 3.** Live birth frequency in couples participating in the Folic Acid and Zinc Supplementation Trial by intervention group, restricted to men with male factor infertility diagnoses and/or poor baseline semen quality measures

**eTable 4.** Semen quality after six months of trial intervention in the Folic Acid and Zinc Supplementation Trial by intervention group, restricted to men with male factor infertility diagnoses and/or poor baseline semen quality measures

**eTable 5.** Early embryonic parameters among participants in the IVF stratum in the Folic Acid and Zinc Supplementation Trial by intervention group

This supplementary material has been provided by the authors to give readers additional information about their work.

**eTable 1.** Semen quality after six months of trial intervention in the Folic Acid and Zinc Supplementation Trial by intervention group, using non-parametric testing

|                                                        | <b>Folic Acid &amp; Zinc Median (IQR)</b> | <b>Placebo Median (IQR)</b> | <b>Median Difference (CI)<sup>a</sup></b> | <b>Stratified Wilcoxon p-value<sup>b</sup></b> | <b>Weighted stratified Wilcoxon p-value<sup>b, c</sup></b> |
|--------------------------------------------------------|-------------------------------------------|-----------------------------|-------------------------------------------|------------------------------------------------|------------------------------------------------------------|
| <b>Overall<sup>d</sup></b>                             | <b>N = 794</b>                            | <b>N = 835</b>              |                                           |                                                |                                                            |
| Concentration, M/mL                                    | 56.0 (103)                                | 69.0 (94.0)                 | -4.2 (-10, 0.6)                           | 0.12                                           | 0.10                                                       |
| Motility, %                                            | 57.5 (26)                                 | 57.0 (27.0)                 | 0.0 (-2.0, 1.8)                           | 0.71                                           | 0.66                                                       |
| Morphology, % normal                                   | 5.0 (5.5)                                 | 5.0 (6.0)                   | 0.0 (-0.5, 0.5)                           | 0.35                                           | 0.30                                                       |
| Volume, mL                                             | 3.2 (2.1)                                 | 3.3 (2.3)                   | 0.0 (-0.1, 0.2)                           | 0.70                                           | 0.75                                                       |
| DNA fragmentation index, %                             | 24.8 (21.2)                               | 22.9 (19.9)                 | 1.5 (0.1, 2.9)                            | 0.05                                           | 0.05                                                       |
| Total motile sperm count, M                            | 100 (227)                                 | 118 (232)                   | -4.4 (-15, 2.9)                           | 0.29                                           | 0.30                                                       |
| <b>IVF<sup>d</sup></b>                                 | <b>N=124</b>                              | <b>N=135</b>                |                                           |                                                |                                                            |
| Concentration, M/mL                                    | 51.1 (105.5)                              | 51.5 (90.0)                 | 0.4 (-13, 13)                             | 0.98                                           | 0.73                                                       |
| Motility, %                                            | 57 (25.8)                                 | 56.8 (26.8)                 | 0.3 (-4.5, 4.8)                           | 0.81                                           | 0.56                                                       |
| Morphology, % normal                                   | 4.5 (5.5)                                 | 4.8 (5.3)                   | 0.0 (-1.0, 1.0)                           | 0.71                                           | 0.56                                                       |
| Volume, mL                                             | 3.2 (2.2)                                 | 3.2 (1.9)                   | 0.0 (-0.4, 0.3)                           | 0.85                                           | 0.81                                                       |
| DNA fragmentation index, %                             | 22.9 (19.3)                               | 20.6 (22.5)                 | 0.7 (-2.7, 4.2)                           | 0.80                                           | 0.84                                                       |
| Total motile sperm count, M                            | 84 (202)                                  | 106.1 (186)                 | -0.2 (-23, 20)                            | 0.82                                           | 0.68                                                       |
| <b>Other infertility treatment onsite<sup>d</sup></b>  | <b>N=566</b>                              | <b>N=590</b>                |                                           |                                                |                                                            |
| Concentration, M/mL                                    | 56 (101)                                  | 72.3 (92.0)                 | -7.2 (-14, -0.5)                          | 0.05                                           | 0.06                                                       |
| Motility, %                                            | 57.1 (25.8)                               | 57.3 (26.5)                 | -0.8 (-3.0, 1.3)                          | 0.50                                           | 0.50                                                       |
| Morphology, % normal                                   | 5.0 (5.5)                                 | 5.5 (5.8)                   | -0.5 (-1.0, 0.0)                          | 0.10                                           | 0.10                                                       |
| Volume, mL                                             | 3.3 (2.2)                                 | 3.3 (2.3)                   | 0.0 (-0.2, 0.2)                           | 0.57                                           | 0.59                                                       |
| DNA fragmentation index, %                             | 25.8 (21.7)                               | 23.1 (18.5)                 | 1.8 (0.0, 3.5)                            | 0.03                                           | 0.02                                                       |
| Total motile sperm count, M                            | 99.9 (236)                                | 119.1 (239)                 | -8.8 (-22, 1.4)                           | 0.19                                           | 0.23                                                       |
| <b>Other infertility treatment offsite<sup>d</sup></b> | <b>N=104</b>                              | <b>N=110</b>                |                                           |                                                |                                                            |
| Concentration, M/mL                                    | 73.8 (108)                                | 67.7 (100)                  | 2.0 (-14, 19)                             | 0.71                                           | 0.82                                                       |
| Motility, %                                            | 61.1 (25.4)                               | 56.1 (32.8)                 | 3.0 (-2.8, 8.5)                           | 0.42                                           | 0.31                                                       |
| Morphology, % normal                                   | 6.0 (7.5)                                 | 5.0 (7.0)                   | 1.0 (-0.3, 2.0)                           | 0.08                                           | 0.10                                                       |
| Volume, mL                                             | 3.2 (2.1)                                 | 3.3 (2.3)                   | 0.0 (-0.4, 0.5)                           | 0.95                                           | 0.89                                                       |
| DNA fragmentation index, %                             | 24.4 (22.3)                               | 23.7 (24.9)                 | 1.2 (-2.9, 5.5)                           | 1.00                                           | 0.82                                                       |
| Total motile sperm count, M                            | 125 (221)                                 | 107 (239)                   | 4.7 (-19, 33)                             | 0.69                                           | 0.71                                                       |

<sup>a</sup>Difference is the Hodges-Lehmann estimation of the location shift between the active and placebo groups. Asymptotic confidence intervals are for the estimate of the location shift. Confidence intervals are calculated using pre-specified 0.049 confidence level for concentration, motility, and morphology (prespecified for interim analysis), and 0.05 confidence level for DNA fragmentation index and total motile sperm count.

<sup>b</sup>Wilcoxon two-sample test two-sided  $P > Z$ , normal approximation, stratified by infertility treatment stratum (IVF, other infertility treatment onsite, and other infertility treatment offsite) and study site, as appropriate.

<sup>c</sup>Semen parameters were weighted by stabilized inverse probability of completing six-month clinic visit (based on treatment assignment, age, pregnancy, gastrointestinal adverse events, education, income, insurance, marital status, stratum, site, employment, and body mass index).

<sup>d</sup>Infertility treatment stratum was the planned infertility treatment ascertained at the time of randomization and included either *in vitro* fertilization (IVF stratum), as well as other infertility treatment strategies including ovulation induction, intrauterine insemination, and natural fertility optimization methods administered through one of the reproductive endocrinology and infertility specialist study centers (other infertility treatment onsite), or with a community provider (other infertility treatment offsite). If sperm concentration was rare/too few to count, no sperm in sample, or retrograde, then concentration, motility, and morphology were set to zero, and DNA fragmentation was calculated as  $[(100 -$

max)/sqrt(2)]+max, where the “max” measured value for DNA fragmentation index was 98.4%. Motility includes % progressive motile and % non-progressive motile. Total motile sperm count calculated as volume \* concentration \* motility. WHO 5 criteria definition for normal morphology is  $\geq 4$  % normal forms.

**eTable 2.** Semen quality after six months of trial intervention in the Folic Acid and Zinc Supplementation Trial by intervention group, treating samples with inadequate sperm concentration (no sperm in sample, rare/too few to calculate, retrograde) as missing

|                                                            | <b>Folic Acid &amp; Zinc, Mean (SD)</b> | <b>Placebo, Mean (SD)</b> | <b>Adjusted mean difference (95% CI)</b> | <b>Adjusted, weighted mean difference (95% CI)</b> |
|------------------------------------------------------------|-----------------------------------------|---------------------------|------------------------------------------|----------------------------------------------------|
| <b>Overall<sup>a,b,c</sup></b>                             | <b>N = 761</b>                          | <b>N = 815</b>            |                                          |                                                    |
| Concentration, M/mL                                        | 88.5 (85.2)                             | 91.2 (84.9)               | -2.5 (-10.9, 5.8)                        | -3.3 (-11.8, 5.2)                                  |
| Motility, %                                                | 54.7 (18.9)                             | 54.2 (18.9)               | 0.5 (-1.4, 2.3)                          | 0.4 (-1.5, 2.3)                                    |
| Morphology, % normal                                       | 5.9 (4.1)                               | 6.2 (4.8)                 | -0.2 (-0.7, 0.2)                         | -0.3 (-0.7, 0.1)                                   |
| Volume, mL                                                 | 3.5 (1.7)                               | 3.5 (1.8)                 | 0.0 (-0.2, 0.2)                          | 0.0 (-0.1, 0.2)                                    |
| DNA fragmentation index, %                                 | 26.5 (14.6)                             | 25.8 (14.8)               | 0.7 (-0.8, 2.2)                          | 0.3 (-1.1, 1.8)                                    |
| Total motile sperm count, M                                | 191 (228)                               | 186 (213)                 | 5.8 (-15.8, 27.3)                        | 5.0 (-16.6, 26.7)                                  |
| <b>IVF<sup>a,b,d</sup></b>                                 | <b>N = 119</b>                          | <b>N = 132</b>            |                                          |                                                    |
| Concentration, M/mL                                        | 85.2 (97.0)                             | 77.8 (78.6)               | 8.3 (-12.8, 29.5)                        | 9.2 (-11.8, 30.2)                                  |
| Motility, %                                                | 54.3 (19.0)                             | 52.5 (19.1)               | 1.6 (-3.1, 6.3)                          | 1.3 (-3.5, 6.1)                                    |
| Morphology, % normal                                       | 5.4 (4.3)                               | 5.6 (4.7)                 | -0.2 (-1.3, 0.9)                         | -0.4 (-1.5, 0.8)                                   |
| Volume, mL                                                 | 3.5 (1.5)                               | 3.5 (1.7)                 | -0.1 (-0.5, 0.3)                         | 0.0 (-0.4, 0.4)                                    |
| DNA fragmentation index, %                                 | 24.6 (14.5)                             | 25.6 (17.5)               | -1.5 (-5.5, 2.6)                         | -1.3 (-5.3, 2.8)                                   |
| Total motile sperm count, M                                | 173 (224)                               | 156 (189)                 | 16.4 (-33.2, 66.0)                       | 17.0 (-32.3, 66.3)                                 |
| <b>Other infertility treatment onsite<sup>a,b,d</sup></b>  | <b>N = 544</b>                          | <b>N = 578</b>            |                                          |                                                    |
| Concentration, M/mL                                        | 88.5 (83.0)                             | 94.1 (84.6)               | -5.4 (-15.2, 4.4)                        | -6.8 (-16.9, 3.3)                                  |
| Motility, %                                                | 54.3 (19.1)                             | 54.7 (18.5)               | -0.4 (-2.5, 1.8)                         | -0.4 (-2.6, 1.8)                                   |
| Morphology, % normal                                       | 5.8 (3.9)                               | 6.4 (4.9)                 | -0.5 (-1.0, 0.0)                         | -0.6 (-1.1, 0.0)                                   |
| Volume, mL                                                 | 3.5 (1.7)                               | 3.5 (1.8)                 | 0.0 (-0.2, 0.2)                          | 0.0 (-0.2, 0.2)                                    |
| DNA fragmentation index, %                                 | 27.1 (14.6)                             | 25.8 (14.1)               | 1.2 (-0.5, 2.9)                          | 0.6 (-1.1, 2.3)                                    |
| Total motile sperm count, M                                | 193 (228)                               | 192 (207)                 | 2.4 (-22.8, 27.7)                        | 1.1 (-24.5, 26.6)                                  |
| <b>Other infertility treatment offsite<sup>a,b,d</sup></b> | <b>N = 98</b>                           | <b>N = 105</b>            |                                          |                                                    |
| Concentration, M/mL                                        | 92.6 (82.6)                             | 91.9 (92.6)               | 1.8 (-23.0, 26.6)                        | 1.8 (-22.8, 26.3)                                  |
| Motility, %                                                | 57.2 (18.1)                             | 53.4 (20.9)               | 3.9 (-1.6, 9.4)                          | 4.5 (-1.1, 10.0)                                   |
| Morphology, % normal                                       | 7 (4.8)                                 | 5.8 (4.3)                 | 1.3 (0.1, 2.6)                           | 1.3 (0.1, 2.6)                                     |
| Volume, mL                                                 | 3.5 (1.7)                               | 3.4 (1.7)                 | 0.0 (-0.4, 0.5)                          | 0.0 (-0.4, 0.5)                                    |
| DNA fragmentation index, %                                 | 26.1 (14.6)                             | 25.5 (14.7)               | -0.3 (-4.6, 3.9)                         | 0.0 (-4.3, 4.2)                                    |
| Total motile sperm count, M                                | 204 (235)                               | 192 (264)                 | 12.8 (-57.9, 83.6)                       | 13.7 (-56.9, 84.3)                                 |

<sup>a</sup>Infertility treatment stratum was the planned infertility treatment ascertained at the time of randomization and included either *in vitro* fertilization (IVF stratum), as well as other infertility treatment strategies including ovulation induction, intrauterine insemination, and natural fertility optimization methods administered through one of the reproductive endocrinology and infertility specialist study centers (other infertility treatment onsite), or with a community provider (other infertility treatment offsite). Motility includes % progressive motile and % non-progressive motile. Total motile sperm count calculated as volume \* concentration \* motility. WHO 5 criteria definition for normal morphology is  $\geq 4\%$  normal forms.

<sup>b</sup>Confidence intervals for concentration, motility, and morphology represent 95.1% confidence intervals to properly account for the alpha spent in the interim analysis.

<sup>c</sup>Adjusted for infertility treatment stratum (IVF, other infertility treatment onsite, and other infertility treatment offsite) and study site.

<sup>d</sup>Adjusted for study site.

**eTable 3.** Live birth frequency in couples participating in the Folic Acid and Zinc Supplementation Trial by intervention group, restricted to men with male factor infertility diagnoses and/or poor baseline semen quality measures

| Live birth                                                  | Folic Acid & Zinc<br>N (%) | Placebo<br>N (%) | Risk Ratio<br>(95% CI) | Risk Difference<br>(95% CI) |
|-------------------------------------------------------------|----------------------------|------------------|------------------------|-----------------------------|
| <b>Any male subfertility indicator at baseline (N=1185)</b> | 191 (32%)                  | 179 (31%)        | 1.04 (0.88, 1.24)      | 1.3 (-3.9, 6.6)             |
| Male factor infertility diagnosis history <sup>a</sup>      | 52 (33%)                   | 61 (37%)         | 0.88 (0.65, 1.19)      | -4.5 (-14.8, 5.9)           |
| Baseline Count $\leq$ 39 M                                  | 49 (24%)                   | 58 (28%)         | 0.88 (0.63, 1.22)      | -3.4 (-11.8, 5.1)           |
| Baseline Motility $\leq$ 40%                                | 78 (30%)                   | 56 (23%)         | 1.27 (0.95, 1.71)      | 6.3 (-1.4, 14.0)            |
| Baseline Morphology < 4% normal forms                       | 137 (32%)                  | 119 (31%)        | 1.04 (0.85, 1.28)      | 1.3 (-5.1, 7.8)             |
| Baseline Total Motile Count < 20 M                          | 60 (25%)                   | 63 (26%)         | 0.97 (0.71, 1.31)      | -0.8 (-8.6, 7.0)            |

<sup>a</sup>Male factor infertility diagnosis self-reported on questionnaire at enrollment.

**eTable 4.** Semen quality after six months of trial intervention in the Folic Acid and Zinc Supplementation Trial by intervention group, restricted to men with male factor infertility diagnoses and/or poor baseline semen quality measures

|                                                                | <b>Folic Acid &amp; Zinc<br/>Mean (SD)</b> | <b>Placebo<br/>Mean (SD)</b> | <b>Difference,<br/>adjusted for site,<br/>strata (95% CI)</b> | <b>Weighted<br/>difference adjusted<br/>for site, strata<br/>(95% CI)</b> |
|----------------------------------------------------------------|--------------------------------------------|------------------------------|---------------------------------------------------------------|---------------------------------------------------------------------------|
| <b>Any male subfertility indicator at baseline<sup>a</sup></b> | <b>n=425</b>                               | <b>n=428</b>                 |                                                               |                                                                           |
| Concentration, M/mL                                            | 54.4 (70.1)                                | 63.4 (78.7)                  | -9.5 (-19.5, 0.5)                                             | -12.5 (-23.1, -1.9)                                                       |
| Motility, %                                                    | 45.2 (23.0)                                | 45.1 (21.6)                  | -0.1 (-3.1, 2.9)                                              | -0.2, (-3.2, 2.9)                                                         |
| Morphology, % normal                                           | 4.1 (3.8)                                  | 4.4 (4.5)                    | -0.4 (-0.9, 0.2)                                              | -0.4 (-1.0, 0.2)                                                          |
| Volume, mL                                                     | 3.5 (1.7)                                  | 3.5 (1.7)                    | 0.0 (-0.2, 0.2)                                               | 0.0 (-0.2, 0.2)                                                           |
| DNA fragmentation index, %                                     | 33.0 (24.0)                                | 30.0 (20.3)                  | 3.1 (0.0, 6.3)                                                | 3.1 (-0.1, 6.4)                                                           |
| Total motile sperm count, M                                    | 106.6 (181.8)                              | 113.6 (158.2)                | -8.6 (-31.3, 14.1)                                            | -12.6 (-36.2, 11.1)                                                       |
| <b>Male factor infertility diagnosis history<sup>a,b</sup></b> | <b>n=127</b>                               | <b>n=125</b>                 |                                                               |                                                                           |
| Concentration, M/mL                                            | 43.2 (55.9)                                | 52.0 (62.4)                  | -8.7 (-23.4, 6.1)                                             | -8.2 (-23.0, 6.6)                                                         |
| Motility, %                                                    | 41.0 (22.8)                                | 43.4 (21.0)                  | -2.5 (-8.0, 3.0)                                              | -2.5 (-8.1, 3.1)                                                          |
| Morphology, % normal                                           | 3.7 (3.9)                                  | 4.3 (4.9)                    | -0.7 (-1.9, 0.4)                                              | -0.9 (-2.0, 0.3)                                                          |
| Volume, mL                                                     | 3.7 (1.7)                                  | 3.6 (1.7)                    | 0.1 (-0.3, 0.5)                                               | 0.1 (-0.3, 0.5)                                                           |
| DNA fragmentation index, %                                     | 37.9 (26.3)                                | 32.8 (23.8)                  | 5.3 (-1.3, 11.8)                                              | 5.6 (-1.1, 12.3)                                                          |
| Total motile sperm count, M                                    | 78.2 (112.8)                               | 86.7 (112.2)                 | -7.9 (-35.7, 20.0)                                            | -7.4 (-35.3, 20.5)                                                        |
| <b>Baseline Count ≤ 39 M<sup>a</sup></b>                       | <b>n=149</b>                               | <b>n=139</b>                 |                                                               |                                                                           |
| Concentration, M/mL                                            | 22.5 (64.4)                                | 23.4 (42.8)                  | -0.9 (-14.0, 12.3)                                            | -1.7 (-14.5, 11.2)                                                        |
| Motility, %                                                    | 33.2 (24.7)                                | 35.6 (23.5)                  | -2.9 (-8.6, 2.9)                                              | -1.8 (-7.7, 4.0)                                                          |
| Morphology, % normal                                           | 3.2 (4.2)                                  | 3.1 (3.6)                    | -0.1 (-1.1, 0.8)                                              | -0.1 (-1.1, 0.9)                                                          |
| Volume, mL                                                     | 3.1 (1.7)                                  | 3.5 (1.8)                    | -0.2 (-0.6, 0.2)                                              | -0.2 (-0.6, 0.2)                                                          |
| DNA fragmentation index, %                                     | 48.8 (31.0)                                | 39.7 (26.6)                  | 8.4 (1.1, 15.7)                                               | 7.3 (-0.3, 14.9)                                                          |
| Total motile sperm count, M                                    | 32.5 (111.4)                               | 35.2 (66.5)                  | -1.9 (-23.8, 19.9)                                            | -3.1 (-24.5, 18.3)                                                        |
| <b>Baseline Motility ≤ 40%<sup>a</sup></b>                     | <b>n=198</b>                               | <b>n=184</b>                 |                                                               |                                                                           |
| Concentration, M/mL                                            | 35.9 (56.5)                                | 42.6 (56.6)                  | -6.9 (-18.4, 4.6)                                             | -6.8 (-18.0, 4.5)                                                         |
| Motility, %                                                    | 33.0 (22.3)                                | 34.0 (21.0)                  | -0.9 (-5.3, 3.5)                                              | -0.3 (-4.8, 4.1)                                                          |
| Morphology, % normal                                           | 3.2 (3.7)                                  | 3.5 (4.1)                    | -0.3 (-1.1, 0.5)                                              | -0.3 (-1.1, 0.5)                                                          |
| Volume, mL                                                     | 3.3 (1.7)                                  | 3.5 (1.8)                    | -0.2 (-0.5, 0.2)                                              | -0.1 (-0.5, 0.2)                                                          |
| DNA fragmentation index, %                                     | 39.1 (29.2)                                | 32.6 (22.1)                  | 6.6 (1.1, 12.2)                                               | 6.3 (0.5, 12.1)                                                           |
| Total motile sperm count, M                                    | 44.2 (76.1)                                | 63.0 (117.9)                 | -18.0 (-38.0, 1.9)                                            | -17.5 (-37.0, 2.0)                                                        |
| <b>Baseline Morphology &lt; 4% normal forms<sup>a</sup></b>    | <b>n=293</b>                               | <b>n=280</b>                 |                                                               |                                                                           |
| Concentration, M/mL                                            | 53.0 (65.6)                                | 68.7 (84.9)                  | -17.0 (-29.4, -4.6)                                           | -20.9 (-34.4, -7.4)                                                       |
| Motility, %                                                    | 45.6 (23.8)                                | 45.4 (22.3)                  | -0.2 (-4.0, 3.6)                                              | -0.5 (-4.4, 3.4)                                                          |
| Morphology, % normal                                           | 3.8 (3.4)                                  | 4.2 (4.4)                    | -0.6 (-1.2, 0.1)                                              | -0.7 (-1.3, 0.0)                                                          |
| Volume, mL                                                     | 3.4 (1.7)                                  | 3.4 (1.7)                    | 0.0 (-0.2, 0.3)                                               | 0.1 (-0.2, 0.3)                                                           |
| DNA fragmentation index, %                                     | 32.8 (24.1)                                | 28.6 (19.0)                  | 4.2 (0.4, 8.0)                                                | 4.6 (0.6, 8.5)                                                            |
| Total motile sperm count, M                                    | 112.5 (197.7)                              | 122.5 (166.5)                | -13.6 (-43.3, 16.2)                                           | -18.7 (-49.8, 12.5)                                                       |
| <b>Baseline total motile count &lt; 20 M<sup>a</sup></b>       | <b>n=180</b>                               | <b>n=169</b>                 |                                                               |                                                                           |
| Concentration, M/mL                                            | 24.9 (59.6)                                | 26.4 (44.4)                  | -2.0 (-13.3, 9.3)                                             | -2.7 (-13.7, 8.4)                                                         |
| Motility, %                                                    | 32.5 (23.5)                                | 33.6 (21.8)                  | -1.5 (-6.4, 3.4)                                              | -0.6 (-5.5, 4.3)                                                          |
| Morphology, % normal                                           | 3.2 (3.9)                                  | 3.2 (3.6)                    | -0.2 (-1.0, 0.7)                                              | -0.2 (-1.0, 0.7)                                                          |
| Volume, mL                                                     | 3.3 (1.8)                                  | 3.4 (1.8)                    | -0.1 (-0.5, 0.2)                                              | -0.1 (-0.5, 0.3)                                                          |
| DNA fragmentation index, %                                     | 43.4 (30.0)                                | 36.5 (24.8)                  | 6.5 (0.3, 12.7)                                               | 5.6 (-0.8, 12.1)                                                          |
| Total motile sperm count, M                                    | 33.7 (103.1)                               | 34.0 (63.0)                  | -0.7 (-19.0, 17.7)                                            | -1.3 (-19.2, 16.5)                                                        |

<sup>a</sup>If sperm concentration was rare/too few to count, no sperm in sample, or retrograde, then concentration, motility, and morphology were set to zero, and DNA fragmentation was calculated as  $[(100 - \text{max})/\sqrt{2}] + \text{max}$ , where the “max” measured value for DNA fragmentation index was 98.4%. Motility includes % progressive motile and % non-progressive motile. Total motile sperm count calculated as volume \* concentration \* motility. WHO 5 criteria definition for normal morphology is  $\geq 4$  % normal forms.

<sup>b</sup>Male factor infertility diagnosis self-reported on questionnaire at enrollment.

**eTable 5.** Early embryonic parameters among participants in the IVF stratum in the Folic Acid and Zinc Supplementation Trial by intervention group

| Continuous outcomes                             | N    | Folic Acid & Zinc<br>Mean (SD)   | Placebo<br>Mean (SD)             | Mean Difference<br>(95% CI) |
|-------------------------------------------------|------|----------------------------------|----------------------------------|-----------------------------|
| <b>Cycle level</b>                              |      |                                  |                                  |                             |
| Fertilization rate, %                           | 243  | 75.3 (2.25)                      | 77.7 (1.74)                      | -2.34 (-7.90, 3.23)         |
| # of good quality embryos on day 5 <sup>a</sup> | 146  | 2.66 (0.23)                      | 2.98 (0.21)                      | -0.11 (-0.33, 0.11)         |
| % good quality embryos on day 5                 | 243  | 17.2 (2.05)                      | 18.5 (1.81)                      | -1.31 (-6.66, 4.05)         |
| # of embryos transferred <sup>a</sup>           | 299  | 1.50 (0.06)                      | 1.51 (0.05)                      | -0.01 (-0.11, 0.10)         |
| # of embryos cryopreserved <sup>a</sup>         | 208  | 4.22 (0.32)                      | 4.32 (0.31)                      | -0.02 (-0.23, 0.18)         |
| Sperm penetration assay results, %              | 24   | 62.7 (13.0)                      | 74.8 (11.0)                      | -12.1 (-45.4, 21.2)         |
| <b>Embryo level</b>                             |      |                                  |                                  |                             |
| # of cells on day 3 <sup>a</sup>                | 2344 | 5.60 (0.20)                      | 5.98 (0.19)                      | -0.07 (-0.16, 0.03)         |
| <b>Categorical outcomes</b>                     |      |                                  |                                  |                             |
|                                                 |      | <b>Predicted<br/>probability</b> | <b>Predicted<br/>probability</b> | <b>Risk Ratio (95% CI)</b>  |
| <b>Cycle level</b>                              |      |                                  |                                  |                             |
| Chromosomal complement                          | 22   |                                  |                                  |                             |
| Abnormal                                        |      | 0.75                             | 0.32                             | 2.35 (0.74, 7.43)           |
| Normal                                          |      | 0.25                             | 0.68                             |                             |
| <b>Embryo level</b>                             |      |                                  |                                  |                             |
| # of cells on day 3                             | 2350 |                                  |                                  |                             |
| <4                                              |      | 0.27                             | 0.22                             | 1.19 (0.88, 1.61)           |
| ≥4                                              |      | 0.73                             | 0.78                             |                             |
| # of cells on day 5                             | 2360 |                                  |                                  |                             |
| <8                                              |      | 0.20                             | 0.19                             | 1.05 (0.77, 1.43)           |
| ≥8                                              |      | 0.80                             | 0.81                             |                             |
| Method of fertilization                         | 3470 |                                  |                                  |                             |
| ICSI                                            |      | 0.74                             | 0.79                             | 0.93 (0.80, 1.09)           |
| Other                                           |      | 0.26                             | 0.21                             |                             |
| Embryo morphology on day 3                      | 1880 |                                  |                                  |                             |
| Excellent/good                                  |      | 0.66                             | 0.68                             | 0.98 (0.87, 1.09)           |
| Fair/poor                                       |      | 0.34                             | 0.32                             |                             |
| Embryo morphology on day 5                      | 1977 |                                  |                                  |                             |
| Excellent/good                                  |      | 0.28                             | 0.35                             | 0.82 (0.63, 1.06)           |
| Fair/poor                                       |      | 0.72                             | 0.65                             |                             |
| Quality of embryos transferred                  | 352  |                                  |                                  |                             |
| Excellent/Good                                  |      | 0.75                             | 0.73                             | 1.03 (0.88, 1.21)           |
| Fair/poor                                       |      | 0.25                             | 0.27                             |                             |

Analyses for embryonic parameters were done using GEE to account for multiple cycles per couple or multiple embryos per cycle.

<sup>a</sup>Analysis for count outcomes done using Poisson regression with GEE.
