# Supplementary material
Source: PubMed Central journal article supplement (PMC6990807)
Supplement: jama-323-35-s003.pdf [file jama-323-35-s003.pdf]

## Data Sharing Statement

Schisterman. Effect of Folic Acid and Zinc Supplementation in Men on Semen Quality and Live Birth Among Couples Undergoing Infertility Treatment. *JAMA*. Published January 07, 2020.  
10.1001/jama.2019.18714

### Data

**Data available:** No

### Additional Information

**Explanation for why data not available:** Trial data will be made accessible in an electronic repository after completion of the studies' analytical phases. The data, along with a set of guidelines for researchers applying for use of the data, will be posted to a data-sharing site, NICHD Data and Specimen Hub (DASH) [<https://dash.nichd.nih.gov/>].
